## Volume 17, 2006 Supplement 2

12th National AIOM Conference – Thoracic Cancers

29–31 March, 2006: Rome, Italy

|                                                                                                      |      |                                                                                                                                                  |      |
|------------------------------------------------------------------------------------------------------|------|--------------------------------------------------------------------------------------------------------------------------------------------------|------|
| <b>small cell lung cancer</b>                                                                        |      | <b>EGFR inhibitors</b>                                                                                                                           |      |
| Small cell lung cancer                                                                               | ii5  | Anti-cancer therapy with EGFR-inhibitors: factors of prognostic and predictive significance                                                      | ii42 |
| <b>diagnostic and therapeutical management of malignant pleural effusion</b>                         |      | Small molecule epidermal growth factor receptor (EGFR) tyrosine kinase inhibitors in non-small cell lung cancer                                  | ii46 |
| Diagnostic and therapeutical management of malignant pleural effusion                                | ii11 | Anti-EGFR monoclonal antibodies in the treatment of non-small cell lung cancer                                                                   | ii49 |
| <b>malignant pleural mesothelioma</b>                                                                |      | Combination of biological therapies in non-small cell lung cancer                                                                                | ii52 |
| Malignant pleural mesothelioma                                                                       | ii13 | Multi-target inhibitors in non-small cell lung cancer (NSCLC)                                                                                    | ii55 |
| <b>non-small cell lung cancer: early stages</b>                                                      |      | <b>lung cancers in the elderly</b>                                                                                                               |      |
| Non-small cell lung cancer: early stages                                                             | ii17 | Chemotherapy of advanced non-small cell lung cancer in elderly patients                                                                          | ii58 |
| <b>mediastinal evaluation: clinical or surgical procedures for staging?</b>                          |      | Chemo-radiotherapy in lung cancer: state of the art with focus on the elderly population                                                         | ii61 |
| Surgical procedures in mediastinal lung cancer staging                                               | ii22 | Extensive small cell lung cancer: standard and experimental treatment approaches in elderly patients                                             | ii64 |
| <b>non-small cell lung cancer: locally advanced</b>                                                  |      | <b>after the response to chemotherapy: first line observation or maintenance therapy?</b>                                                        |      |
| Locally advanced non-small cell lung cancer: different strategies for different diseases             | ii24 | Maintenance chemotherapy in non-small cell lung cancer                                                                                           | ii67 |
| Locally advanced non-small cell lung cancer: role of induction chemotherapy in resectable N2 disease | ii28 | <b>treatment and prophylaxis in NSCLC for brain metastases from NSCLC</b>                                                                        |      |
| Multimodality treatment in locally advanced non-small cell lung cancer                               | ii32 | Treatment and prophylaxis for brain metastases from non-small cell lung cancer: whole brain radiation treatment versus stereotactic radiosurgery | ii71 |
| New radiation techniques for treatment of locally advanced non-small cell lung cancer (NSCLC)        | ii34 | Brain metastases in patients with non-small cell lung cancer: focus on the role of chemotherapy                                                  | ii73 |
| <b>treatment of advanced non-small cell lung cancer</b>                                              |      | Prophylactic cranial irradiation in non-small cell lung cancer                                                                                   | ii76 |
| Treatment of advanced non-small cell lung cancer                                                     | ii36 |                                                                                                                                                  |      |

Continued overleaf

## women and lung cancer

Women and lung cancer ii79

## treatment of advanced non-small cell lung cancer: chemotherapy with or without cisplatin?

Treatment of advanced non-small cell lung cancer: chemotherapy with or without cisplatin? ii83

## the new drugs advent: clinical or economic outcomes?

The new drugs advent: clinical or economic outcomes? ii88

## palliative care

Bisphosphonates and metastatic bone disease ii91

New antiemetic drugs ii96

Author index ii101
